# Supplementary material
Source: Elsevier journal article supplement (https://www.sciencedirect.com/science/article/pii/S1695403321002198)
Supplement: mmc1 [file S1695403321002198:mmc1.pdf]

## Encuesta sobre calidad de vida y trastorno de deglución

Esta encuesta ha sido diseñada para saber si las dificultades para tragar/deglutir que tiene su hijo/a han afectado la calidad de su vida diaria. Nos interesaría recoger sus opiniones sobre una serie de cuestiones, todas ellas relacionadas con la repercusión que tiene los problemas de deglución de su hijo/a en su calidad de vida y en la de sus cuidadores principales. La información se utilizará para conocer el impacto social que supone la disfagia en las familias.

### ¿Durante el último mes, con qué frecuencia ha experimentado los síntomas descritos?

|                 | Nunca | Muy pocas veces | Algunas veces | La mayoría de las veces | Siempre |
|-----------------|-------|-----------------|---------------|-------------------------|---------|
| Me siento débil | 1     | 2               | 3             | 4                       | 5       |

|                                                                                                                                                                                                                                                                                 |  |
|---------------------------------------------------------------------------------------------------------------------------------------------------------------------------------------------------------------------------------------------------------------------------------|--|
| Vivir con el problema de tragar de mi hijo es muy difícil                                                                                                                                                                                                                       |  |
| Saber qué puede y qué no puede comer mi hijo supone un problema para mi                                                                                                                                                                                                         |  |
| Mi hijo tarda mucho tiempo en comer (más de 30 minutos)                                                                                                                                                                                                                         |  |
| Pienso que mi hijo no disfruta cuando come                                                                                                                                                                                                                                      |  |
| Es difícil encontrar alimentos que le gusten y que pueda comer                                                                                                                                                                                                                  |  |
| Es muy frecuente la presencia de síntomas relacionados con los problemas de deglución de mi hijo.<br>Entendiendo por síntomas, por ejemplo: tos durante la ingesta, atragantarse, saliva o flemas espesas, problemas al masticar, restos de comida en la boca o en la garganta. |  |
| Cuando le doy de comer sólidos temo que pueda atragantarse                                                                                                                                                                                                                      |  |
| Tengo miedo de que pueda atragantarse cuando bebe                                                                                                                                                                                                                               |  |
| El problema para tragar de mi hijo nos afecta al ánimo de la familia negativamente                                                                                                                                                                                              |  |
| Es una preocupación tener que ser tan cuidadoso para alimentar a mi hijo                                                                                                                                                                                                        |  |
| El problema para tragar de mi hijo nos genera frustración                                                                                                                                                                                                                       |  |
| El problema para tragar de mi hijo nos pone impacientes                                                                                                                                                                                                                         |  |
| No comemos fuera de casa (en restaurantes) por el problema para tragar de mi hijo                                                                                                                                                                                               |  |
| El problema para tragar de mi hijo dificulta mi vida social                                                                                                                                                                                                                     |  |
| El problema para tragar de mi hijo ha hecho que mi forma de trabajar tenga que cambiar                                                                                                                                                                                          |  |
| El problema para tragar de mi hijo hace que los eventos sociales no sean situaciones agradables                                                                                                                                                                                 |  |
| Debido a los problemas de deglución de mi hijo mi rol frente a familia/amigos ha cambiado                                                                                                                                                                                       |  |
| Todos estos problemas me generan cansancio                                                                                                                                                                                                                                      |  |
| Me siento agotado/a por todos estos problemas                                                                                                                                                                                                                                   |  |
| Tengo problemas para conciliar / mantener el sueño                                                                                                                                                                                                                              |  |

|                                                            |    |    |
|------------------------------------------------------------|----|----|
| Me ha resultado fácil contestar el formulario de preguntas | SI | NO |
|------------------------------------------------------------|----|----|

De una escala del 1 al 5, ¿cómo cree que interfieren las dificultades para tragar de su hijo en sus actividades de la vida diaria? (1=nada; 5= mucho)

|   |   |   |   |   |
|---|---|---|---|---|
| 1 | 2 | 3 | 4 | 5 |
|---|---|---|---|---|
